# Supplementary material
Source: MDPI journal article supplement (https://www.mdpi.com/2073-8994/15/9/1714)
Supplement: s1 [file s1]

## Supporting information

for

### **D-Idose-based Monoaza-15-crown-5 Lariat Ethers: Synthesis of an Elusive D-Hexose and Application of Derived Macrocycles in Enantioselective Syntheses**

*István Orbán, Dóra Viktória Ujj, Béla Mátravölgyi, Tamás Holczbauer, Zsolt Rapi \**

*Crystal data of 6:* C<sub>14</sub> H<sub>18</sub> O<sub>6</sub>, *F*<sub>w</sub>: 282.28, colourless, block, size: 0.50 x 0.50 x 0.30 mm, orthorhombic, space group *P* 2<sub>1</sub> 2<sub>1</sub> 2<sub>1</sub>, *a* = 11.1137(5) Å, *b* = 11.2985(5) Å, *c* = 22.2672(11) Å,  $\alpha = 90^\circ$ ,  $\beta = 90^\circ$ ,  $\gamma = 90^\circ$ , *V* = 2796.1(2) Å<sup>3</sup>, *T* = 298(2) K, *Z* = 8, *Z'* = 2, *F*(000) = 1200, *D*<sub>x</sub> = 1.341 Mg/m<sup>3</sup>,  $\mu$  0.885 mm<sup>-1</sup>.

A crystal of compound **6** was mounted on a loop. Cell parameters were determined by least-squares using 18503 ( $3.915 \leq \theta \leq 67.97^\circ$ ) reflections. Intensity data were collected on a(n) Rigaku RAXIS-RAPID II diffractometer (monochromator; Cu-K $\alpha$  radiation,  $\lambda = 1.54187 \text{ \AA}$ ) at 298(2) K in the range  $3.971 \leq \theta \leq 68.036$ . A total of 23337 reflections were collected of which 4948 were unique [*R*(int) = 0.0401, *R*( $\sigma$ ) = 0.0391]; intensities of 3307 reflections were greater than  $2\sigma(I)$ . Completeness to  $\theta = 0.986$ .

A numerical absorption correction was applied to the data (the minimum and maximum transmission factors were 0.924071 and 0.969107).

The structure was solved by constr methods (and subsequent difference syntheses).

Anisotropic full-matrix least-squares refinement on *F*<sup>2</sup> for all non-hydrogen atoms yielded *R*<sub>1</sub> = 0.0498 and *wR*<sup>2</sup> = 0.1001 for 1332 [*I* > 2 $\sigma(I)$ ] and *R*<sub>1</sub> = 0.0815 and *wR*<sup>2</sup> = 0.1131 for all (4948) intensity data, (number of parameters = 367, goodness-of-fit = 1.009, the maximum and mean shift/esd is 0.000 and 0.000). The absolute structure parameter is 0.06(7). (Friedel coverage: 0.736, Friedel fraction max.: 0.950, Friedel fraction full: 0.954).

The maximum and minimum residual electron density in the final difference map was 0.16 and -0.20 e.Å<sup>-3</sup>.

The weighting scheme applied was  $w = 1/[\sigma^2(F_o^2) + (0.04490.3834P)^2 + 0.3834P]$  where  $P = (F_o^2 + 2F_c^2)/3$ .

Hydrogen atomic positions were calculated from assumed geometries. Hydrogen atoms were included in structure factor calculations, but they were not refined. The isotropic displacement parameters of the hydrogen atoms were approximated from the  $U(\text{eq})$  value of the atom they were bonded to.

The crystallographic information files (CIFs), which are deposited at Cambridge Crystallographic Data Centre (CCDC No. 2276749).

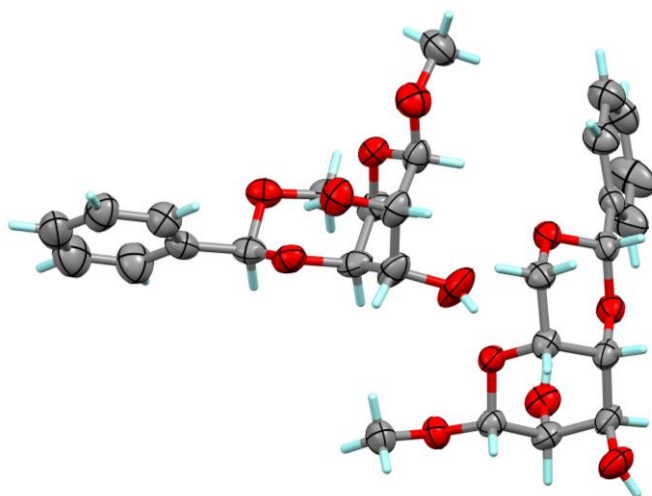

**Figure S1.** Ortep-style representation of the asymmetric unit. The ellipsoids are drawn with 30% probability level. Two independent molecules are observed within the asymmetric unit. The configuration is the same, but the conformation of the phenyl rings is the difference within the molecules.

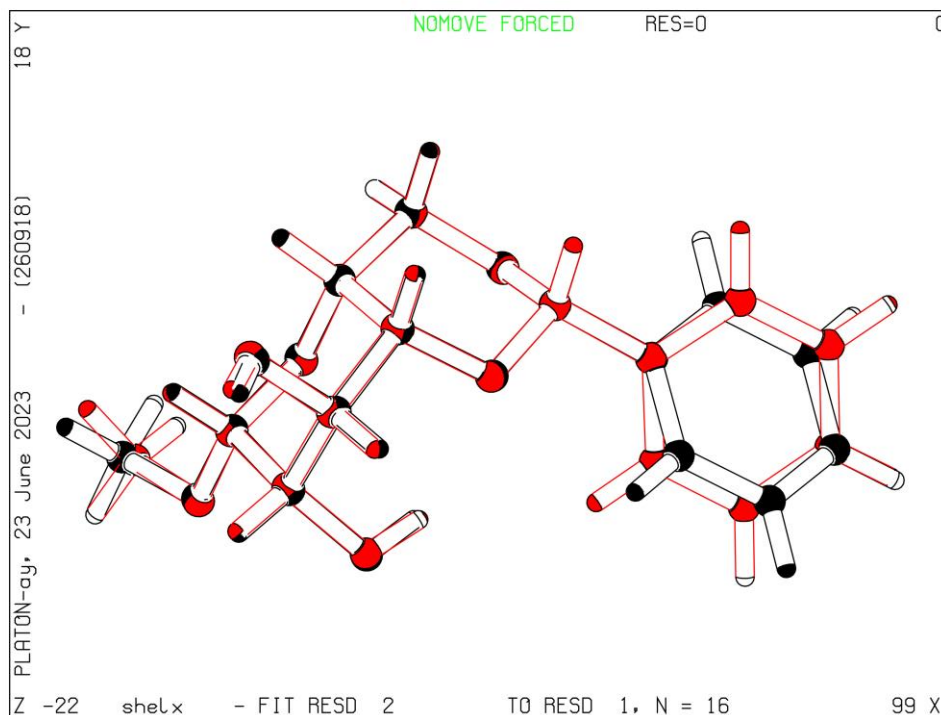

**Figure S2.** The conformation differences of the molecules.

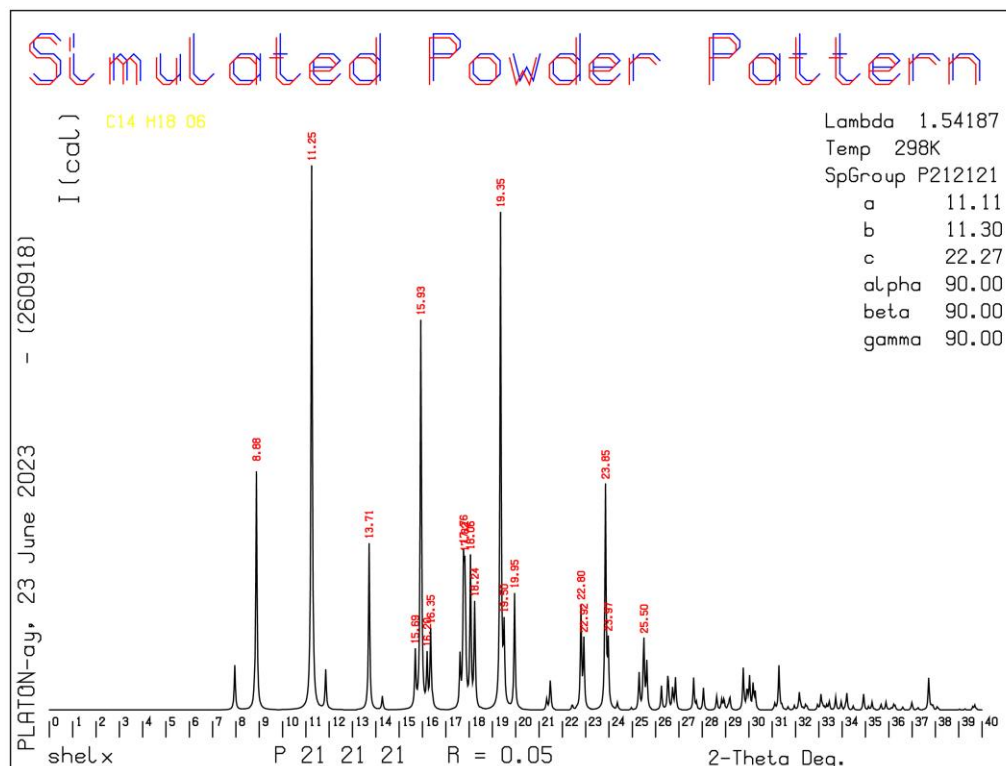

**Figure S3.** The simulated powder diffractogram of the measured single crystal.

**Table S1.** Summary of crystallographic data, data collections, structure determination and refinement for methyl-4,6-*O*-benzylidene- $\beta$ -D-idopyranoside (**6**)

|                                     |                                                                                                                                     |
|-------------------------------------|-------------------------------------------------------------------------------------------------------------------------------------|
| number                              | <b>6</b>                                                                                                                            |
| CCDC number                         | 2276749                                                                                                                             |
| Empirical formula                   | C <sub>14</sub> H <sub>18</sub> O <sub>6</sub>                                                                                      |
| Formula weight                      | 282.28                                                                                                                              |
| Temperature                         | 298(2)                                                                                                                              |
| Radiation and wavelength            | Cu-K $\alpha$ ,<br>$\lambda$ = 1.54187 Å                                                                                            |
| Crystal system                      | orthorhombic                                                                                                                        |
| Space group                         | <i>P</i> 2 <sub>1</sub> 2 <sub>1</sub> 2 <sub>1</sub>                                                                               |
| Unit cell dimensions                | <i>a</i> = 11.1137(5) Å<br><i>b</i> = 11.2985(5) Å<br><i>c</i> = 22.2672(11) Å<br>$\alpha$ = 90°<br>$\beta$ = 90°<br>$\gamma$ = 90° |
| Volume                              | 2796(1) Å <sup>3</sup>                                                                                                              |
| <i>Z</i> , <i>Z'</i>                | 8, 2                                                                                                                                |
| Density (calculated)                | 1.341 Mg/m <sup>3</sup>                                                                                                             |
| Absorption coefficient, $\mu$       | 0.885 mm <sup>-1</sup>                                                                                                              |
| <i>F</i> (000)                      | 1200                                                                                                                                |
| Crystal colour and description      | colourless, block                                                                                                                   |
| Crystal size                        | 0.50 x 0.50 x 0.30 mm                                                                                                               |
| Absorption correction               | numerical                                                                                                                           |
| Max. and min. transmission          | 0.924071 and 0.969107                                                                                                               |
| $\theta$ –range for data collection | $3.971 \leq \theta \leq 68.036^\circ$                                                                                               |
| Index ranges                        | $-13 \leq h \leq 13$ ;<br>$-13 \leq k \leq 11$ ;<br>$-26 \leq l \leq 26$                                                            |

|                                      |                                     |
|--------------------------------------|-------------------------------------|
| Reflections collected                | 23337                               |
| Completeness to 2 $\theta$           | 0.987                               |
| Absolute structure parameter         |                                     |
| Flack                                | 0.06(7)                             |
| Hooft                                | 0.07(6)                             |
| Parsonz                              | 0.08(7)                             |
| Friedel coverage                     | 0.736                               |
| Friedel fraction max.                | 0.950                               |
| Friedel fraction full                | 0.954                               |
| Independent reflections              | 4948 [ $R(\text{int})=0.0401$ ]     |
| Reflections $I>2\sigma(I)$           | 3307                                |
| Data / restraints / parameters       | 4948 / 0 / 367                      |
| Goodness-of-fit on $F^2$             | 1.009                               |
| Final $R$ indices [ $I>2\sigma(I)$ ] | $R_1=0.0498$ ,<br>$wR^2=0.1001$     |
| $R$ indices (all data)               | $R_1=0.0815$ ,<br>$wR^2=0.1131$     |
| Max. and mean shift/esd              | 0.000;0.000                         |
| Largest diff. peak and hole          | 0.16 and -0.20 e. $\text{\AA}^{-3}$ |

However, two independent molecules are observed within the asymmetric unit. These two molecules exhibit slight conformational differences within the phenyl rings (Figure S2). The differences between the two molecules are also evident in the short contacts with neighboring molecules. A useful program for analyzing the spatial arrangement and contacts surrounding the molecules is the Crystal Explorer Hirshfeld Surface Analysis program. The Hirshfeld surface analysis provides a visualization of the molecular interactions, often referred to as a "fingerprint." These fingerprint shapes illustrate the variations between the molecules. The interactions can be categorized into different element types, with the most notable difference observed between carbon and oxygen atoms. The dissimilarity in carbon atoms can arise from the rotation of the phenyl groups, while the disparity in oxygen atoms is particularly noticeable in the hydrogen bonding pattern (Figure S3). The hydrogen bonding motifs differ between the two molecules. molecule #1 has more acceptor positions than molecule #2 (Figure S4). Additionally, the distances between the hydrogen bond atoms also vary (Table S2).

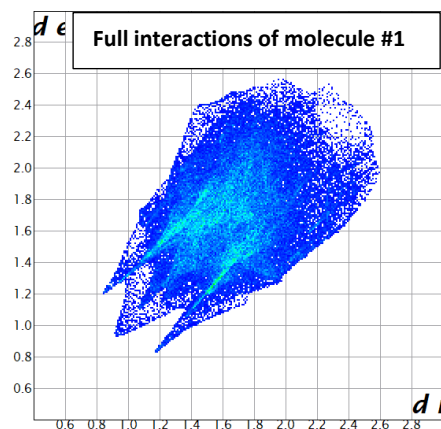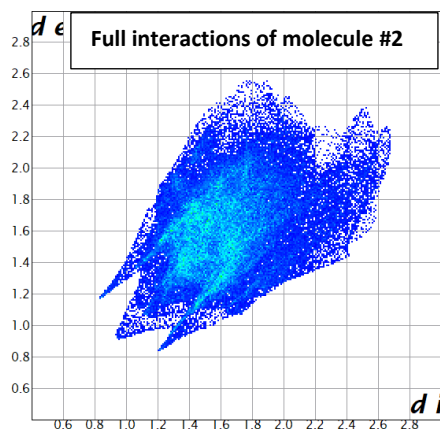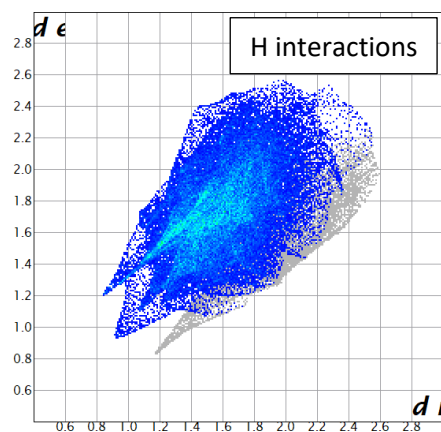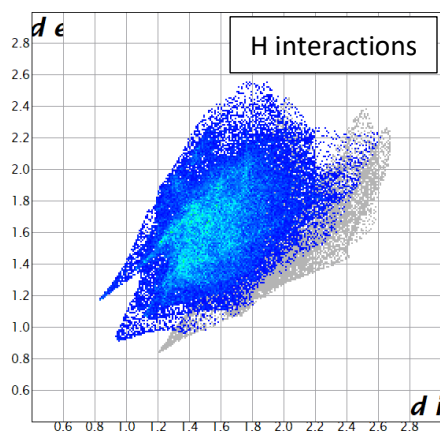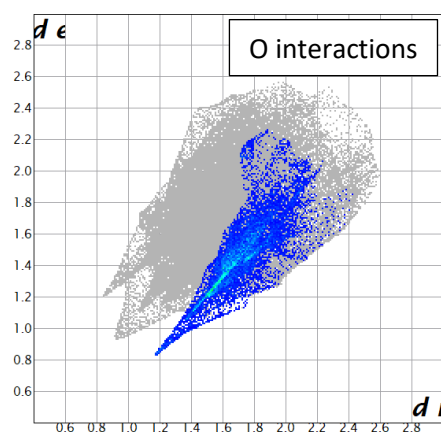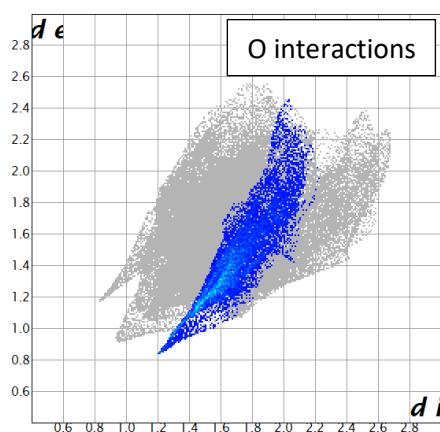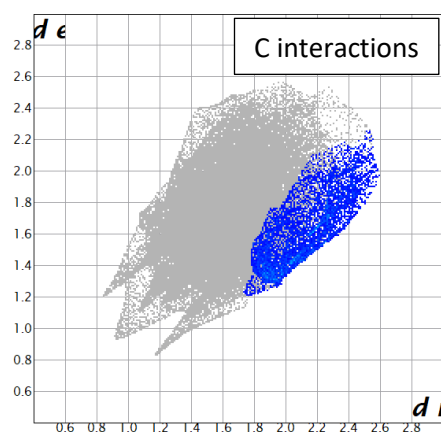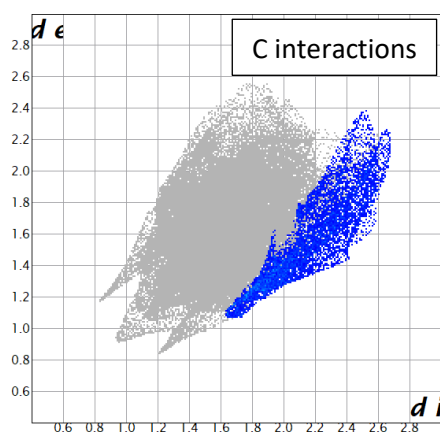

a.)

b.)

**Figure S3.** The Hirshfeld surface analysis of the two molecules in the asymmetric unit. First column is the named molecule #1 a.), and the second column is the named molecule #2 b.).

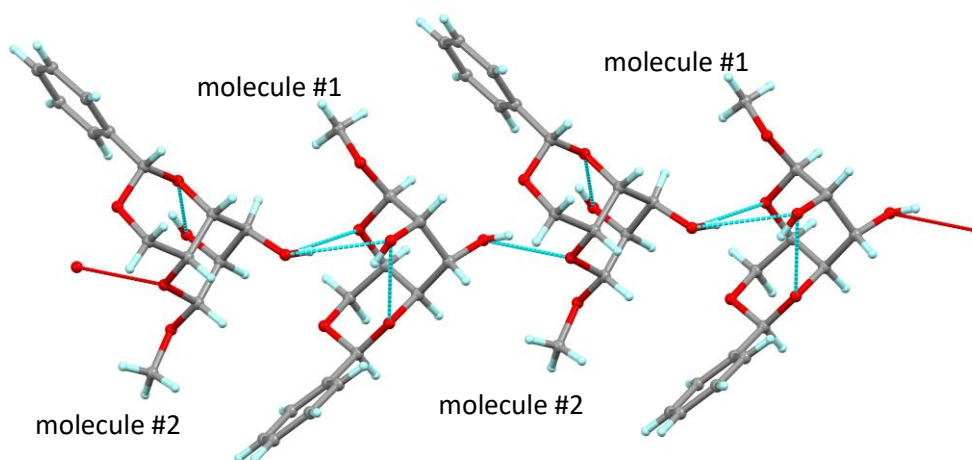

**Figure S4.** The Hydrogen-bond motifs within the molecules.

**Table S2.** The hydrogen bond Donor (D), hydrogen (H) and Acceptor (A) distances and angles

| D<br>_flag_hbond_publ | H      | A                    | $d(\text{D-H})$<br>(Å) | $d(\text{H}\cdots\text{A})$<br>(Å) | $d(\text{D}\cdots\text{A})$<br>(Å) | $\angle(\text{D-H}\cdots\text{A})$<br>(°) |
|-----------------------|--------|----------------------|------------------------|------------------------------------|------------------------------------|-------------------------------------------|
| O18_1                 | H18_1  | O1_1                 | 0.82                   | 2.21                               | 2.844(4)                           | 134                                       |
| O18_1                 | H18_1  | O35_2                | 0.82                   | 2.52                               | 3.030(5)                           | 121                                       |
| O19_1                 | H19_1  | O32_2 <sup>\$1</sup> | 0.82                   | 2.16                               | 2.924(4)                           | 154                                       |
| O34_2                 | H34_2  | O21_2                | 0.82                   | 2.13                               | 2.819(4)                           | 142                                       |
| O35_2                 | H35_2  | O13_1                | 0.82                   | 2.22                               | 3.008(4)                           | 162                                       |
| O35_2                 | H35_2  | O18_1                | 0.82                   | 2.54                               | 3.030(5)                           | 120                                       |
| C22_2                 | H22_2  | O18_1                | 0.98                   | 2.32                               | 3.274(5)                           | 163                                       |
| C23_2                 | H23B_2 | O17_1                | 0.97                   | 2.6                                | 3.496(5)                           | 153                                       |
| C33_2                 | H33_2  | O3_1                 | 0.98                   | 2.64                               | 3.499(6)                           | 146                                       |
| C2_1                  | H2_1   | O34_2 <sup>\$2</sup> | 0.98                   | 2.63                               | 3.540(5)                           | 155                                       |
| C15_1                 | H15_1  | O23_2 <sup>\$1</sup> | 0.98                   | 2.52                               | 3.405(5)                           | 150                                       |

Symmetry codes to generate equivalent atoms:

\$1. [1\_545] x,y-\*,z

\$2. [3\_556] x+1/2,-y+1/2,-z+1



**Table S3.** Atomic coordinates ( $\times 10^4$ ) and equivalent isotropic displacement parameters ( $\text{\AA}^2 \times 10^3$ ).  $U(\text{eq})$  is defined as one third of the trace of the orthogonalized  $U_{ij}$  tensor.

|       | <i>x</i> | <i>y</i> | <i>z</i> | <i>U</i> (eq) |
|-------|----------|----------|----------|---------------|
| O1_1  | 3768(2)  | 184(2)   | 3847(1)  | 70(1)         |
| O3_1  | 3796(2)  | 1723(2)  | 4542(1)  | 69(1)         |
| O13_1 | 1442(2)  | 723(2)   | 4401(1)  | 64(1)         |
| O17_1 | -274(2)  | 635(3)   | 3853(1)  | 76(1)         |
| O18_1 | 1648(3)  | 69(3)    | 3133(1)  | 86(1)         |
| O19_1 | 1891(4)  | -2287(3) | 4244(2)  | 98(1)         |
| C2_1  | 4503(4)  | 992(4)   | 4165(2)  | 67(1)         |
| C4_1  | 3185(4)  | 1030(4)  | 4983(2)  | 71(1)         |
| C5_1  | 2406(4)  | 106(4)   | 4691(2)  | 67(1)         |
| C6_1  | 3128(4)  | -596(4)  | 4241(2)  | 69(1)         |
| C7_1  | 5154(4)  | 1780(4)  | 3729(2)  | 73(1)         |
| C8_1  | 5803(4)  | 2721(5)  | 3940(2)  | 93(2)         |
| C9_1  | 6426(5)  | 3452(5)  | 3554(3)  | 102(2)        |
| C10_1 | 6402(5)  | 3274(6)  | 2959(3)  | 105(2)        |
| C11_1 | 5760(5)  | 2347(7)  | 2741(2)  | 132(2)        |
| C12_1 | 5139(5)  | 1588(6)  | 3124(2)  | 115(2)        |
| C14_1 | 629(4)   | -56(4)   | 4095(2)  | 65(1)         |
| C15_1 | 1267(4)  | -704(4)  | 3594(2)  | 71(1)         |
| C16_1 | 2334(4)  | -1379(4) | 3862(2)  | 75(1)         |
| C20_1 | -1126(4) | 1075(4)  | 4279(2)  | 95(2)         |
| O21_2 | -151(3)  | 5151(3)  | 3580(1)  | 79(1)         |
| O23_2 | 335(3)   | 6724(3)  | 2947(1)  | 79(1)         |
| O32_2 | 2408(3)  | 5656(2)  | 3490(1)  | 69(1)         |
| O33_2 | 3613(3)  | 5497(3)  | 4310(1)  | 99(1)         |
| O34_2 | 1302(3)  | 4942(3)  | 4612(1)  | 93(1)         |
| O35_2 | 1861(5)  | 2647(3)  | 3491(2)  | 126(1)        |
| C22_2 | -605(4)  | 5991(4)  | 3160(2)  | 77(1)         |
| C23_2 | 1215(4)  | 6041(4)  | 2630(2)  | 85(1)         |

|       |          |         |         |        |
|-------|----------|---------|---------|--------|
| C24_2 | 1724(4)  | 5085(4) | 3029(2) | 78(1)  |
| C25_2 | 721(5)   | 4368(4) | 3313(2) | 83(1)  |
| C26_2 | -1497(4) | 6781(4) | 3460(2) | 78(1)  |
| C27_2 | -1436(5) | 7093(5) | 4057(2) | 93(2)  |
| C28_2 | -2238(6) | 7876(5) | 4309(3) | 108(2) |
| C29_2 | -3111(6) | 8374(6) | 3961(4) | 121(2) |
| C30_2 | -3190(7) | 8080(7) | 3370(4) | 138(2) |
| C31_2 | -2394(6) | 7291(6) | 3120(3) | 122(2) |
| C32_2 | 1189(5)  | 3545(4) | 3802(2) | 90(2)  |
| C33_2 | 1988(5)  | 4188(4) | 4239(2) | 85(1)  |
| C34_2 | 2956(4)  | 4840(4) | 3908(2) | 79(1)  |
| C38_2 | 4640(5)  | 6053(5) | 4071(3) | 118(2) |

**Table S4.** Hydrogen coordinates ( $\times 10^4$ ) and isotropic displacement parameters ( $\text{\AA}^2 \times 10^3$ ).

|        | <i>x</i> | <i>y</i> | <i>z</i> | <i>U</i> (iso) |
|--------|----------|----------|----------|----------------|
| H18_1  | 2197     | 487      | 3258     | 129            |
| H19_1  | 1801     | -2897    | 4049     | 147            |
| H2_1   | 5089     | 555      | 4407     | 81             |
| H4A_1  | 2690     | 1541     | 5231     | 85             |
| H4B_1  | 3771     | 647      | 5241     | 85             |
| H5_1   | 2080     | -426     | 4998     | 80             |
| H6_1   | 3709     | -1091    | 4457     | 83             |
| H8_1   | 5824     | 2869     | 4350     | 111            |
| H9_1   | 6869     | 4080     | 3709     | 123            |
| H10_1  | 6818     | 3775     | 2701     | 127            |
| H11_1  | 5735     | 2216     | 2329     | 159            |
| H12_1  | 4713     | 950      | 2968     | 138            |
| H14_1  | 287      | -626     | 4379     | 78             |
| H15_1  | 707      | -1280    | 3420     | 85             |
| H16_1  | 2811     | -1732    | 3538     | 90             |
| H20A_1 | -1770    | 1465     | 4070     | 143            |
| H20B_1 | -738     | 1627     | 4543     | 143            |
| H20C_1 | -1444    | 428      | 4509     | 143            |
| H34_2  | 779      | 5268     | 4412     | 139            |
| H35_2  | 1832     | 2027     | 3682     | 189            |
| H22_2  | -986     | 5579     | 2822     | 93             |
| H23A_2 | 1860     | 6555     | 2496     | 102            |
| H23B_2 | 848      | 5683     | 2279     | 102            |
| H24_2  | 2248     | 4563     | 2794     | 93             |
| H25_2  | 326      | 3895     | 3001     | 100            |
| H27_2  | -836     | 6766     | 4296     | 112            |
| H28_2  | -2185    | 8066     | 4715     | 130            |
| H29_2  | -3650    | 8911     | 4126     | 145            |
| H30_2  | -3788    | 8417     | 3133     | 165            |

|        |       |      |      |     |
|--------|-------|------|------|-----|
| H31_2  | -2461 | 7099 | 2715 | 146 |
| H32_2  | 512   | 3184 | 4016 | 108 |
| H33_2  | 2376  | 3595 | 4495 | 101 |
| H34A_2 | 3479  | 4282 | 3695 | 95  |
| H38A_2 | 5020  | 5534 | 3787 | 178 |
| H38B_2 | 5193  | 6231 | 4390 | 178 |
| H38C_2 | 4408  | 6773 | 3874 | 178 |

**Table S5.** Anisotropic displacement parameters ( $\text{\AA}^2 \times 10^3$ ). The anisotropic displacement factor exponent takes the form:  $-2\pi^2(h^2a^{*2}U_{11} + \dots + 2hka^*b^*U_{12})$

|       | $U_{11}$ | $U_{22}$ | $U_{33}$ | $U_{23}$ | $U_{13}$ | $U_{12}$ |
|-------|----------|----------|----------|----------|----------|----------|
| O1_1  | 70(2)    | 72(2)    | 69(2)    | -11(2)   | -1(1)    | 4(2)     |
| O3_1  | 66(2)    | 72(2)    | 70(2)    | -12(2)   | 3(1)     | 2(2)     |
| O13_1 | 67(2)    | 55(2)    | 68(2)    | -4(1)    | -5(1)    | 3(2)     |
| O17_1 | 67(2)    | 81(2)    | 82(2)    | 3(2)     | -7(2)    | 11(2)    |
| O18_1 | 105(2)   | 87(2)    | 66(2)    | -2(2)    | -2(2)    | -3(2)    |
| O19_1 | 126(3)   | 54(2)    | 113(2)   | -2(2)    | -19(2)   | 2(2)     |
| C2_1  | 57(2)    | 75(3)    | 70(2)    | -12(2)   | -9(2)    | 11(2)    |
| C4_1  | 73(3)    | 77(3)    | 63(2)    | -12(2)   | -4(2)    | -3(3)    |
| C5_1  | 78(3)    | 64(3)    | 59(2)    | 0(2)     | -7(2)    | 7(3)     |
| C6_1  | 73(3)    | 62(3)    | 73(3)    | -6(2)    | -10(2)   | 14(2)    |
| C7_1  | 49(2)    | 93(4)    | 76(3)    | -10(3)   | 1(2)     | 12(3)    |
| C8_1  | 90(3)    | 108(4)   | 80(3)    | -5(3)    | -7(3)    | -10(3)   |
| C9_1  | 90(4)    | 110(4)   | 107(4)   | 1(4)     | 4(3)     | -12(4)   |
| C10_1 | 83(4)    | 136(5)   | 98(4)    | 16(4)    | 19(3)    | 1(4)     |
| C11_1 | 109(4)   | 215(7)   | 73(3)    | -5(4)    | 23(3)    | -40(5)   |
| C12_1 | 97(4)    | 158(6)   | 88(4)    | -33(4)   | 19(3)    | -31(4)   |
| C14_1 | 71(3)    | 56(3)    | 67(2)    | 3(2)     | -6(2)    | 1(2)     |
| C15_1 | 85(3)    | 56(3)    | 70(3)    | -7(2)    | -4(2)    | -5(3)    |
| C16_1 | 91(3)    | 50(2)    | 84(3)    | -12(2)   | -4(3)    | 8(3)     |
| C20_1 | 77(3)    | 93(4)    | 115(4)   | -4(3)    | 13(3)    | 11(3)    |
| O21_2 | 91(2)    | 68(2)    | 78(2)    | 0(2)     | 14(2)    | -16(2)   |
| O23_2 | 86(2)    | 85(2)    | 67(2)    | 8(2)     | 1(2)     | -16(2)   |
| O32_2 | 83(2)    | 60(2)    | 63(2)    | -1(1)    | 4(2)     | 0(2)     |
| O33_2 | 98(2)    | 107(3)   | 94(2)    | 2(2)     | -13(2)   | 1(2)     |
| O34_2 | 112(3)   | 92(2)    | 74(2)    | 0(2)     | 23(2)    | 8(2)     |
| O35_2 | 186(4)   | 55(2)    | 137(3)   | -11(2)   | 58(3)    | 3(3)     |
| C22_2 | 78(3)    | 87(4)    | 66(3)    | -8(3)    | -7(2)    | -19(3)   |
| C23_2 | 91(3)    | 103(4)   | 60(2)    | -7(3)    | 8(3)     | -20(3)   |
| C24_2 | 102(3)   | 68(3)    | 64(3)    | -8(2)    | 11(2)    | -7(3)    |

|       |        |        |        |        |        |        |
|-------|--------|--------|--------|--------|--------|--------|
| C25_2 | 100(3) | 71(3)  | 79(3)  | -21(3) | 12(3)  | -24(3) |
| C26_2 | 71(3)  | 82(3)  | 82(3)  | 6(3)   | -3(3)  | -16(3) |
| C27_2 | 100(4) | 97(4)  | 83(3)  | 2(3)   | -5(3)  | 2(3)   |
| C28_2 | 118(5) | 96(4)  | 110(4) | -4(4)  | 26(4)  | 5(4)   |
| C29_2 | 99(4)  | 101(5) | 163(6) | 10(5)  | 22(5)  | 9(4)   |
| C30_2 | 117(5) | 142(7) | 154(7) | 20(5)  | -23(5) | 19(5)  |
| C31_2 | 115(5) | 135(6) | 116(5) | -1(4)  | -16(4) | 13(5)  |
| C32_2 | 123(4) | 53(3)  | 95(3)  | 4(3)   | 39(3)  | -3(3)  |
| C33_2 | 110(4) | 64(3)  | 80(3)  | 8(3)   | 11(3)  | 12(3)  |
| C34_2 | 91(3)  | 58(3)  | 87(3)  | 11(3)  | 17(3)  | 12(3)  |
| C38_2 | 77(3)  | 134(5) | 144(5) | 4(4)   | -2(3)  | -4(4)  |

**Table S6.** Bond lengths (Å) and angles (°) to be deposited

|                  |          |                   |          |
|------------------|----------|-------------------|----------|
| O1_1-C2_1        | 1.415(4) | O1_1-C6_1         | 1.433(5) |
| O3_1-C2_1        | 1.417(4) | O3_1-C4_1         | 1.428(5) |
| O13_1-C5_1       | 1.431(5) | O13_1-C14_1       | 1.434(4) |
| O17_1-C14_1      | 1.380(4) | O17_1-C20_1       | 1.429(5) |
| O18_1-C15_1      | 1.412(5) | O19_1-C16_1       | 1.420(5) |
| C2_1-C7_1        | 1.503(6) | C4_1-C5_1         | 1.504(6) |
| C5_1-C6_1        | 1.509(5) | C6_1-C16_1        | 1.509(5) |
| C7_1-C12_1       | 1.363(6) | C7_1-C8_1         | 1.368(6) |
| C8_1-C9_1        | 1.378(7) | C9_1-C10_1        | 1.341(7) |
| C10_1-C11_1      | 1.357(7) | C11_1-C12_1       | 1.393(7) |
| C14_1-C15_1      | 1.511(5) | C15_1-C16_1       | 1.531(6) |
| O21_2-C22_2      | 1.426(5) | O21_2-C25_2       | 1.441(5) |
| O23_2-C22_2      | 1.415(5) | O23_2-C23_2       | 1.431(5) |
| O32_2-C24_2      | 1.430(5) | O32_2-C34_2       | 1.446(5) |
| O33_2-C34_2      | 1.373(5) | O33_2-C38_2       | 1.408(6) |
| O34_2-C33_2      | 1.413(5) | O35_2-C32_2       | 1.437(5) |
| C22_2-C26_2      | 1.492(6) | C23_2-C24_2       | 1.509(6) |
| C24_2-C25_2      | 1.516(6) | C25_2-C32_2       | 1.524(6) |
| C26_2-C27_2      | 1.377(6) | C26_2-C31_2       | 1.379(7) |
| C27_2-C28_2      | 1.376(7) | C28_2-C29_2       | 1.363(8) |
| C29_2-C30_2      | 1.359(8) | C30_2-C31_2       | 1.374(8) |
| C32_2-C33_2      | 1.505(6) | C33_2-C34_2       | 1.497(6) |
|                  |          |                   |          |
| C2_1-O1_1-C6_1   | 112.1(3) | C2_1-O3_1-C4_1    | 110.6(3) |
| C5_1-O13_1-C14_1 | 112.8(3) | C14_1-O17_1-C20_1 | 114.9(3) |
| O1_1-C2_1-O3_1   | 110.7(3) | O1_1-C2_1-C7_1    | 109.7(3) |
| O3_1-C2_1-C7_1   | 107.8(3) | O3_1-C4_1-C5_1    | 110.9(3) |
| O13_1-C5_1-C4_1  | 106.8(3) | O13_1-C5_1-C6_1   | 110.8(3) |
| C4_1-C5_1-C6_1   | 110.2(4) | O1_1-C6_1-C5_1    | 110.3(3) |
| O1_1-C6_1-C16_1  | 107.9(3) | C5_1-C6_1-C16_1   | 111.6(4) |

|                   |          |                   |          |
|-------------------|----------|-------------------|----------|
| C12_1-C7_1-C8_1   | 118.0(5) | C12_1-C7_1-C2_1   | 122.5(5) |
| C8_1-C7_1-C2_1    | 119.5(4) | C7_1-C8_1-C9_1    | 121.1(5) |
| C10_1-C9_1-C8_1   | 121.0(5) | C9_1-C10_1-C11_1  | 118.7(5) |
| C10_1-C11_1-C12_1 | 121.1(5) | C7_1-C12_1-C11_1  | 120.0(6) |
| O17_1-C14_1-O13_1 | 107.2(3) | O17_1-C14_1-C15_1 | 109.1(3) |
| O13_1-C14_1-C15_1 | 110.7(3) | O18_1-C15_1-C14_1 | 112.1(3) |
| O18_1-C15_1-C16_1 | 111.0(4) | C14_1-C15_1-C16_1 | 108.5(3) |
| O19_1-C16_1-C6_1  | 106.9(4) | O19_1-C16_1-C15_1 | 109.0(4) |
| C6_1-C16_1-C15_1  | 112.3(3) | C22_2-O21_2-C25_2 | 112.0(3) |
| C22_2-O23_2-C23_2 | 110.7(3) | C24_2-O32_2-C34_2 | 113.5(3) |
| C34_2-O33_2-C38_2 | 115.2(4) | O23_2-C22_2-O21_2 | 110.4(3) |
| O23_2-C22_2-C26_2 | 106.9(4) | O21_2-C22_2-C26_2 | 109.8(4) |
| O23_2-C23_2-C24_2 | 110.6(3) | O32_2-C24_2-C23_2 | 107.3(4) |
| O32_2-C24_2-C25_2 | 109.5(3) | C23_2-C24_2-C25_2 | 110.6(4) |
| O21_2-C25_2-C24_2 | 109.8(4) | O21_2-C25_2-C32_2 | 108.0(3) |
| C24_2-C25_2-C32_2 | 111.9(4) | C27_2-C26_2-C31_2 | 117.3(5) |
| C27_2-C26_2-C22_2 | 123.6(5) | C31_2-C26_2-C22_2 | 118.9(5) |
| C28_2-C27_2-C22_2 | 121.8(5) | C29_2-C28_2-C22_2 | 119.6(6) |



|              |          |              |          |
|--------------|----------|--------------|----------|
| C26_2        |          | C27_2        |          |
| C30_2-C29_2- | 119.8(7) | C29_2-C30_2- | 120.6(7) |
| C28_2        |          | C31_2        |          |
| C30_2-C31_2- | 120.9(6) | O35_2-C32_2- | 110.2(5) |
| C26_2        |          | C33_2        |          |
| O35_2-C32_2- | 105.3(4) | C33_2-C32_2- | 111.7(4) |
| C25_2        |          | C25_2        |          |
| O34_2-C33_2- | 112.3(4) | O34_2-C33_2- | 110.7(4) |
| C34_2        |          | C32_2        |          |
| C34_2-C33_2- | 110.1(4) | O33_2-C34_2- | 107.4(3) |
| C32_2        |          | O32_2        |          |
| O33_2-C34_2- | 109.1(4) | O32_2-C34_2- | 109.2(4) |
| C33_2        |          | C33_2        |          |

**Table S7.** Torsion angles (°) to be deposited

|                         |           |                         |           |
|-------------------------|-----------|-------------------------|-----------|
| C6_1-O1_1-C2_1-O3_1     | -61.5(4)  | C6_1-O1_1-C2_1-C7_1     | 179.7(3)  |
| C4_1-O3_1-C2_1-O1_1     | 62.2(4)   | C4_1-O3_1-C2_1-C7_1     | -177.9(3) |
| C2_1-O3_1-C4_1-C5_1     | -57.7(4)  | C14_1-O13_1-C5_1-C4_1   | 179.3(3)  |
| C14_1-O13_1-C5_1-C6_1   | 59.3(4)   | O3_1-C4_1-C5_1-O13_1    | -68.7(4)  |
| O3_1-C4_1-C5_1-C6_1     | 51.6(4)   | C2_1-O1_1-C6_1-C5_1     | 55.3(4)   |
| C2_1-O1_1-C6_1-C16_1    | 177.5(3)  | O13_1-C5_1-C6_1-O1_1    | 68.1(4)   |
| C4_1-C5_1-C6_1-O1_1     | -49.9(4)  | O13_1-C5_1-C6_1-C16_1   | -52.0(5)  |
| C4_1-C5_1-C6_1-C16_1    | -169.9(4) | O1_1-C2_1-C7_1-C12_1    | -8.7(6)   |
| O3_1-C2_1-C7_1-C12_1    | -129.2(5) | O1_1-C2_1-C7_1-C8_1     | 172.2(4)  |
| O3_1-C2_1-C7_1-C8_1     | 51.6(5)   | C12_1-C7_1-C8_1-C9_1    | -0.1(7)   |
| C2_1-C7_1-C8_1-C9_1     | 179.1(4)  | C7_1-C8_1-C9_1-C10_1    | 0.9(8)    |
| C8_1-C9_1-C10_1-C11_1   | -0.7(9)   | C9_1-C10_1-C11_1-C12_1  | -0.3(9)   |
| C8_1-C7_1-C12_1-C11_1   | -0.7(8)   | C2_1-C7_1-C12_1-C11_1   | -179.9(5) |
| C10_1-C11_1-C12_1-C7_1  | 1.0(9)    | C20_1-O17_1-C14_1-O13_1 | -74.2(4)  |
| C20_1-O17_1-C14_1-C15_1 | 165.9(4)  | C5_1-O13_1-C14_1-O17_1  | 178.0(3)  |
| C5_1-O13_1-C14_1-       | -63.0(4)  | O17_1-C14_1-C15_1-      | 52.1(4)   |

|                    |           |                    |           |
|--------------------|-----------|--------------------|-----------|
| C15_1              |           | O18_1              |           |
| O13_1-C14_1-C15_1- | -65.7(4)  | O17_1-C14_1-C15_1- | 175.1(3)  |
| O18_1              |           | C16_1              |           |
| O13_1-C14_1-C15_1- | 57.3(4)   | O1_1-C6_1-C16_1-   | 168.9(3)  |
| C16_1              |           | O19_1              |           |
| C5_1-C6_1-C16_1-   | -69.7(4)  | O1_1-C6_1-C16_1-   | -71.6(4)  |
| O19_1              |           | C15_1              |           |
| C5_1-C6_1-C16_1-   | 49.8(5)   | O18_1-C15_1-C16_1- | -169.8(3) |
| C15_1              |           | O19_1              |           |
| C14_1-C15_1-C16_1- | 66.5(4)   | O18_1-C15_1-C16_1- | 71.9(4)   |
| O19_1              |           | C6_1               |           |
| C14_1-C15_1-C16_1- | -51.8(5)  | C23_2-O23_2-C22_2- | 62.8(4)   |
| C6_1               |           | O21_2              |           |
| C23_2-O23_2-C22_2- | -177.8(3) | C25_2-O21_2-C22_2- | -62.1(4)  |
| C26_2              |           | O23_2              |           |
| C25_2-O21_2-C22_2- | -179.7(3) | C22_2-O23_2-C23_2- | -58.0(4)  |
| C26_2              |           | C24_2              |           |
| C34_2-O32_2-C24_2- | -179.9(3) | C34_2-O32_2-C24_2- | 60.0(4)   |
| C23_2              |           | C25_2              |           |
| O23_2-C23_2-C24_2- | -67.8(4)  | O23_2-C23_2-C24_2- | 51.6(5)   |
| O32_2              |           | C25_2              |           |
| C22_2-O21_2-C25_2- | 55.4(4)   | C22_2-O21_2-C25_2- | 177.6(4)  |
| C24_2              |           | C32_2              |           |
| O32_2-C24_2-C25_2- | 68.2(5)   | C23_2-C24_2-C25_2- | -49.9(5)  |
| O21_2              |           | O21_2              |           |
| O32_2-C24_2-C25_2- | -51.7(5)  | C23_2-C24_2-C25_2- | -169.8(4) |
| C32_2              |           | C32_2              |           |
| O23_2-C22_2-C26_2- | -88.2(5)  | O21_2-C22_2-C26_2- | 31.5(6)   |
| C27_2              |           | C27_2              |           |
| O23_2-C22_2-C26_2- | 87.5(5)   | O21_2-C22_2-C26_2- | -152.7(5) |
| C31_2              |           | C31_2              |           |
| C31_2-C26_2-C27_2- | 0.4(7)    | C22_2-C26_2-C27_2- | 176.3(4)  |
| C28_2              |           | C28_2              |           |

|                             |           |                             |           |
|-----------------------------|-----------|-----------------------------|-----------|
| C26_2-C27_2-C28_2-<br>C29_2 | -0.9(8)   | C27_2-C28_2-C29_2-<br>C30_2 | 0.8(9)    |
| C28_2-C29_2-C30_2-<br>C31_2 | 0(1)      | C29_2-C30_2-C31_2-<br>C26_2 | 0(1)      |
| C27_2-C26_2-C31_2-<br>C30_2 | 0.1(8)    | C22_2-C26_2-C31_2-<br>C30_2 | -176.0(5) |
| O21_2-C25_2-C32_2-<br>O35_2 | 168.9(4)  | C24_2-C25_2-C32_2-<br>O35_2 | -70.1(5)  |
| O21_2-C25_2-C32_2-<br>C33_2 | -71.5(5)  | C24_2-C25_2-C32_2-<br>C33_2 | 49.5(5)   |
| O35_2-C32_2-C33_2-<br>O34_2 | -170.9(3) | C25_2-C32_2-C33_2-<br>O34_2 | 72.5(5)   |
| O35_2-C32_2-C33_2-<br>C34_2 | 64.4(5)   | C25_2-C32_2-C33_2-<br>C34_2 | -52.3(5)  |
| C38_2-O33_2-C34_2-<br>O32_2 | -68.6(5)  | C38_2-O33_2-C34_2-<br>C33_2 | 173.1(4)  |
| C24_2-O32_2-C34_2-<br>O33_2 | 178.0(3)  | C24_2-O32_2-C34_2-<br>C33_2 | -63.8(4)  |
| O34_2-C33_2-C34_2-<br>O33_2 | 51.3(5)   | C32_2-C33_2-C34_2-<br>O33_2 | 175.1(4)  |
| O34_2-C33_2-C34_2-<br>O32_2 | -65.9(5)  | C32_2-C33_2-C34_2-<br>O32_2 | 57.9(5)   |
